# Supplementary material
Source: PubMed Central journal article supplement (PMC9825940)
Supplement: JCC-43-1942-s001.pdf [file JCC-43-1942-s001.pdf]

# **Supporting Information for:**

## **A Molecular Evolution Algorithm for Ligand Design in DOCK**

Lauren E. Prentis,<sup>§,1</sup> Courtney D. Singleton,<sup>§,2</sup> John D. Bickel,<sup>3</sup> William J. Allen,<sup>4</sup> Robert C. Rizzo<sup>\*,4,5,6</sup>

<sup>1</sup> *Department of Biochemistry & Cell Biology, Stony Brook University, Stony Brook, New York 11794, USA.*

<sup>2</sup> *Department of Molecular Pharmacology, Stony Brook University, Stony Brook, New York, 11794, USA.*

<sup>3</sup> *Department of Chemistry, Stony Brook University, Stony Brook, New York, 11794, USA.*

<sup>4</sup> *Department of Applied Mathematics & Statistics, Stony Brook University, Stony Brook, New York 11794, USA.*

<sup>5</sup> *Institute of Chemical Biology & Drug Discovery, Stony Brook University, Stony Brook, New York 11794, USA.*

<sup>6</sup> *Laufer Center for Physical & Quantitative Biology, Stony Brook University, Stony Brook, New York 11794, USA.*

\* Corresponding author e-mail: rizzorc@gmail.com, phone: 631-632-9340, fax: 631-632-8490.

§ These authors contributed equally to this work.

Contract/grant sponsor: National Institutes of Health; Contract/grant numbers: T32GM136572 (to L.E.P and J.D.B), and R35GM126906 (to R.C.R).

**Figure S1. Convergence Results Using Multiple Random Seeds.** The graph below shows results for four test systems using three different random seeds.

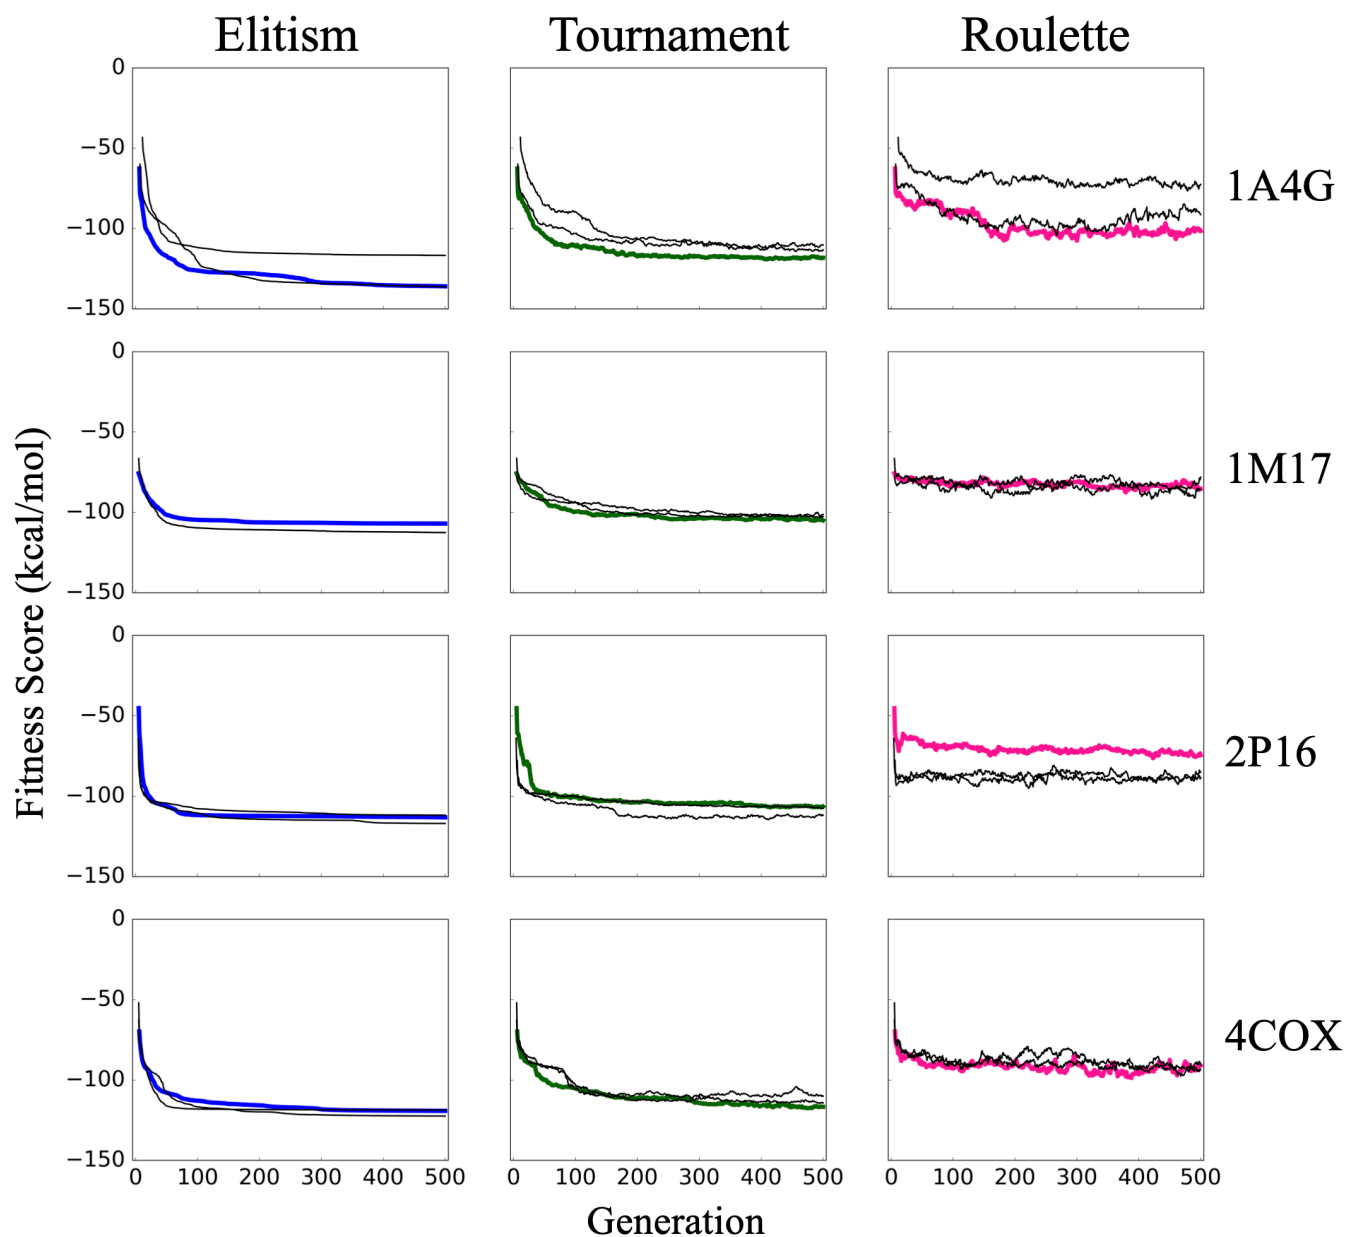

**Figure S1.** Mean fitness scores with standard deviation, for the top 25 molecules evolved in 1A4G (NA), 1M17 (EGFR), 2P16 (FXA), and 4COX (COX2) using elitism (blue), tournament (green), and roulette (red) selection methods. Dark colored lines (Seed 0) represent the same data as in Figure 8 of the main text. Black lines represent results using two additional random seeds (Seed 2, Seed 3).

**Table S1. DOCK6 Genetic Algorithm Input File.** The input below is a representative example of a complete parameter file used to execute the genetic algorithm with the elitism selection method described in the main text. Parameters unique to the genetic algorithm are shaded in gray. Interested users should consult the Rizzo lab website for the most up to date DOCK6 tutorials located at [https://ringo.ams.stonybrook.edu/index.php/Main\\_Page](https://ringo.ams.stonybrook.edu/index.php/Main_Page).

| <b>PARAMETER</b>              | <b>VALUE</b>                        |
|-------------------------------|-------------------------------------|
| conformer search type         | genetic                             |
| ga molecule file              | initial parent ensemble.mol2        |
| ga fraglib scaffold file      | parameters/fraglib ga scaffold.mol2 |
| ga fraglib linker file        | parameters/fraglib linker.mol2      |
| ga fraglib sidechain file     | parameters/fraglib sidechain.mol2   |
| ga torenv table               | fraglib torenv.dat                  |
| ga max generations            | 100                                 |
| ga xover on                   | yes                                 |
| ga xover sampling method rand | yes                                 |
| ga xover max                  | 150                                 |
| ga bond tolerance             | 0.5                                 |
| ga angle cutoff               | 0.14                                |
| ga check overlap              | yes                                 |
| ga mutate addition            | yes                                 |
| ga mutate deletion            | yes                                 |
| ga mutate substitution        | yes                                 |
| ga mutate replacement         | yes                                 |
| ga use dn roulette            | no                                  |
| ga mutate parents             | yes                                 |
| ga pmut rate                  | 0.4                                 |
| ga omut rate                  | 0.7                                 |
| ga max mut cycles             | 10                                  |
| ga mut sampling method        | rand                                |
| ga num random picks           | 10                                  |
| ga max root size              | 5                                   |
| ga energy cutoff              | 100                                 |
| ga heur unmatched num         | 5                                   |
| ga heur matched rmsd          | 2                                   |
| ga constraint mol wt          | 550                                 |
| ga constraint rot bon         | 20                                  |
| ga constraint H accept        | 10                                  |
| ga constraint H don           | 5                                   |
| ga constraint formal charge   | 4                                   |
| ga ensemble size              | 100                                 |
| ga selection method           | elitism                             |
| ga elitism combined           | no                                  |
| ga elitism option             | max                                 |

|                                                         |                    |
|---------------------------------------------------------|--------------------|
| ga niching                                              | no                 |
| ga selection extinction                                 | no                 |
| ga max num gen with no crossover                        | 500                |
| ga name identifier                                      | ga                 |
| ga output prefix                                        | 1M17               |
| use internal energy                                     | yes                |
| internal energy rep exp                                 | 12                 |
| internal energy cutoff                                  | 100                |
| use database filter                                     | no                 |
| orient ligand                                           | no                 |
| bump filter                                             | no                 |
| score molecules                                         | yes                |
| contact score primary                                   | no                 |
| grid score primary                                      | no                 |
| gist score primary                                      | no                 |
| multigrid score primary                                 | no                 |
| dock3.5 score primary                                   | no                 |
| continuous score primary                                | no                 |
| footprint similarity score primary                      | no                 |
| pharmacophore score primary                             | no                 |
| hbond score primary                                     | no                 |
| interal score primary                                   | no                 |
| descriptor score primary                                | yes                |
| descriptor use grid score                               | yes                |
| descriptor use pharmacophore score                      | yes                |
| descriptor use tanimoto                                 | yes                |
| descriptor use hungarian                                | yes                |
| descriptor use volume overlap                           | yes                |
| descriptor use gist                                     | no                 |
| descriptor use dock3.5                                  | no                 |
| descriptor grid score rep rad scale                     | 1                  |
| descriptor grid score vdw scale                         | 1                  |
| descriptor grid score es scale                          | 1                  |
| descriptor grid score grid prefix                       | grid.rec           |
| descriptor fms score use ref mol2                       | yes                |
| descriptor fms score ref mol2 filename                  | reference lig.mol2 |
| descriptor fms score write reference pharmacophore mol2 | no                 |
| descriptor fms score write reference pharmacophore txt  | no                 |
| descriptor fms score write candidate pharmacophore      | no                 |
| descriptor fms score write matched pharmacophore        | no                 |
| descriptor fms score compare type                       | overlap            |
| descriptor fms score full match                         | yes                |
| descriptor fms score match rate weight                  | 5                  |
| descriptor fms score match dist cutoff                  | 1                  |
| descriptor fms score match proj cutoff                  | 0.7071             |
| descriptor fms score max score                          | 20                 |
| descriptor fingerprint ref filename                     | reference lig.mol2 |
| descriptor hms score ref filename                       | reference lig.mol2 |
| descriptor hms score matching coeff                     | -5                 |
| descriptor hms score rmsd coeff                         | 1                  |
| descriptor volume score reference mol2 filename         | reference lig.mol2 |

|                                                |                             |
|------------------------------------------------|-----------------------------|
| descriptor volume score overlap compute method | analytical                  |
| descriptor weight grid score                   | 1                           |
| descriptor weight pharmacophore score          | 0                           |
| descriptor weight fingerprint tanimoto         | 0                           |
| descriptor weight hms score                    | 0                           |
| descriptor weight volume overlap score         | -15                         |
| minimize ligand                                | yes                         |
| minimize anchor                                | yes                         |
| minimize flexible growth                       | yes                         |
| use advanced simplex parameters                | no                          |
| simplex max cycles                             | 1                           |
| simplex score converge                         | 0.1                         |
| simplex cycle converge                         | 1                           |
| simplex trans step                             | 1                           |
| simplex rot step                               | 0.1                         |
| simplex tors step                              | 10                          |
| simplex anchor max iterations                  | 500                         |
| simplex grow max iterations                    | 250                         |
| simplex grow tors premin iterations            | 0                           |
| simplex random seed                            | 4                           |
| simplex restraint min                          | yes                         |
| simplex coefficient restraint                  | 10                          |
| atom model                                     | all                         |
| vdw defn file                                  | parameters/vdw_de_novo.defn |
| flex defn file                                 | parameters/flex.defn        |
| flex drive file                                | parameters/flex_drive.tbl   |
| chem defn file                                 | parameters/chem.defn        |
| pharmacophore defn file                        | parameters/ph4.defn         |

**Note 1:** For parameter name "ga\_torenv\_table" users should augment the standard "fraglib\_torenv.dat" supplied with DOCK6 to include any additional torsion entries that the initial parent(s) may contain. Please consult the DOCK6 user's manual for additional information.

**Note 2:** For parameter name "vdw\_defn\_file" users should specify the file named "vdw\_de\_novo.defn" supplied with DOCK6 which includes appropriate VDW parameters for dummy (DU) atoms needed during growth. Please consult the DOCK6 user's manual for additional information.
